# Supplementary material for: Construction of a nomogram to predict the survival of metastatic gastric cancer patients that received immunotherapy
Source: PubMed Central journal article supplement (PMC9549034; doi:10.3389/fimmu.2022.950868), 2022-09-26
Supplement: Image_1.pdf [file Image_1.pdf]

Overall Survival Rate

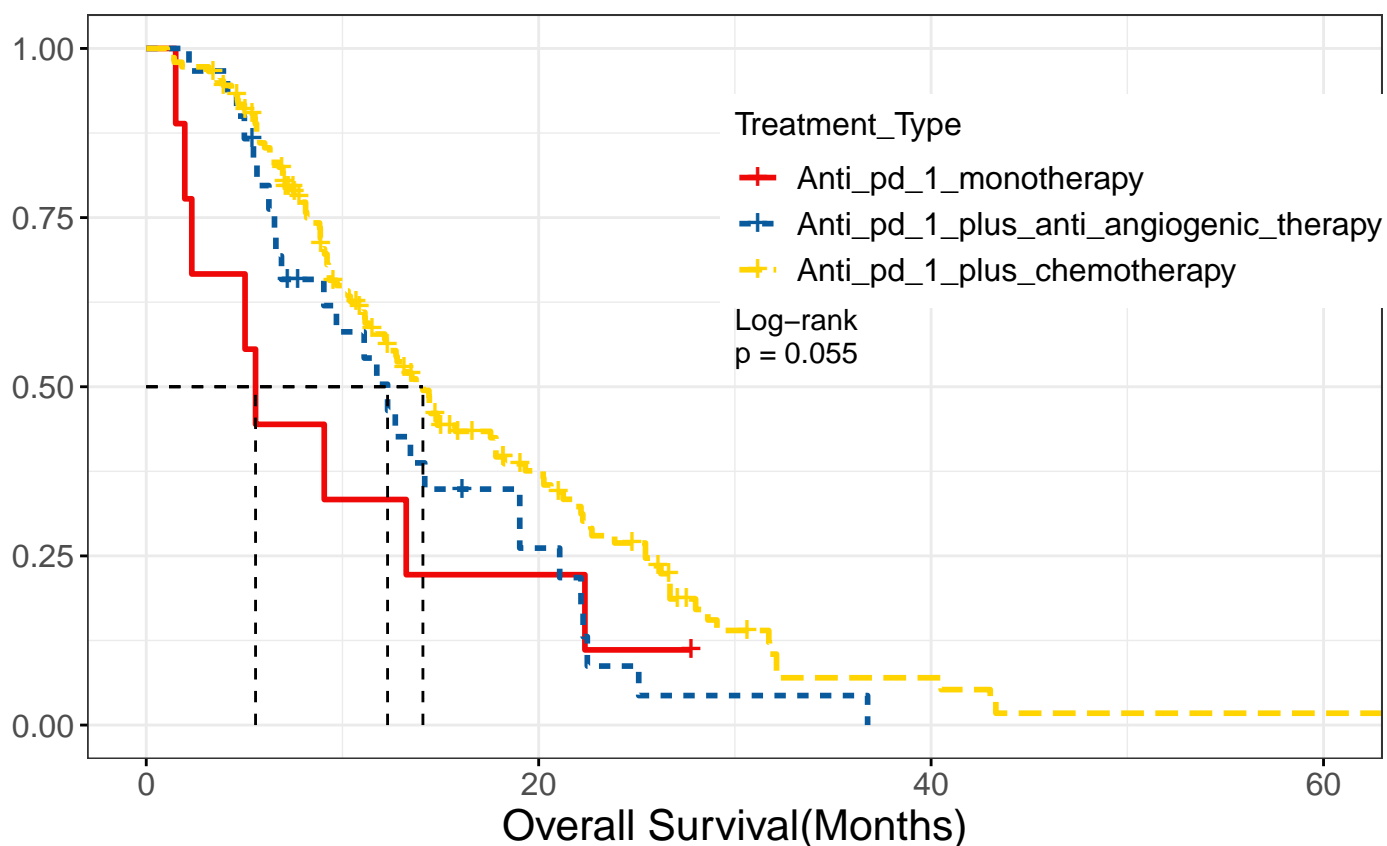

Number at risk

| Treatment_Type                         | 0   | 20 | 40 | 60 |
|----------------------------------------|-----|----|----|----|
| Anti_pd_1_monotherapy                  | 9   | 2  | 0  | 0  |
| Anti_pd_1_plus_anti_angiogenic_therapy | 30  | 6  | 0  | 0  |
| Anti_pd_1_plus_chemotherapy            | 147 | 36 | 4  | 1  |

Overall Survival(Months)
