# Supplementary material for: Construction of a nomogram to predict the survival of metastatic gastric cancer patients that received immunotherapy
Source: PubMed Central journal article supplement (PMC9549034; doi:10.3389/fimmu.2022.950868), 2022-09-26
Supplement: Image_2.pdf [file Image_2.pdf]

Overall Survival Rate

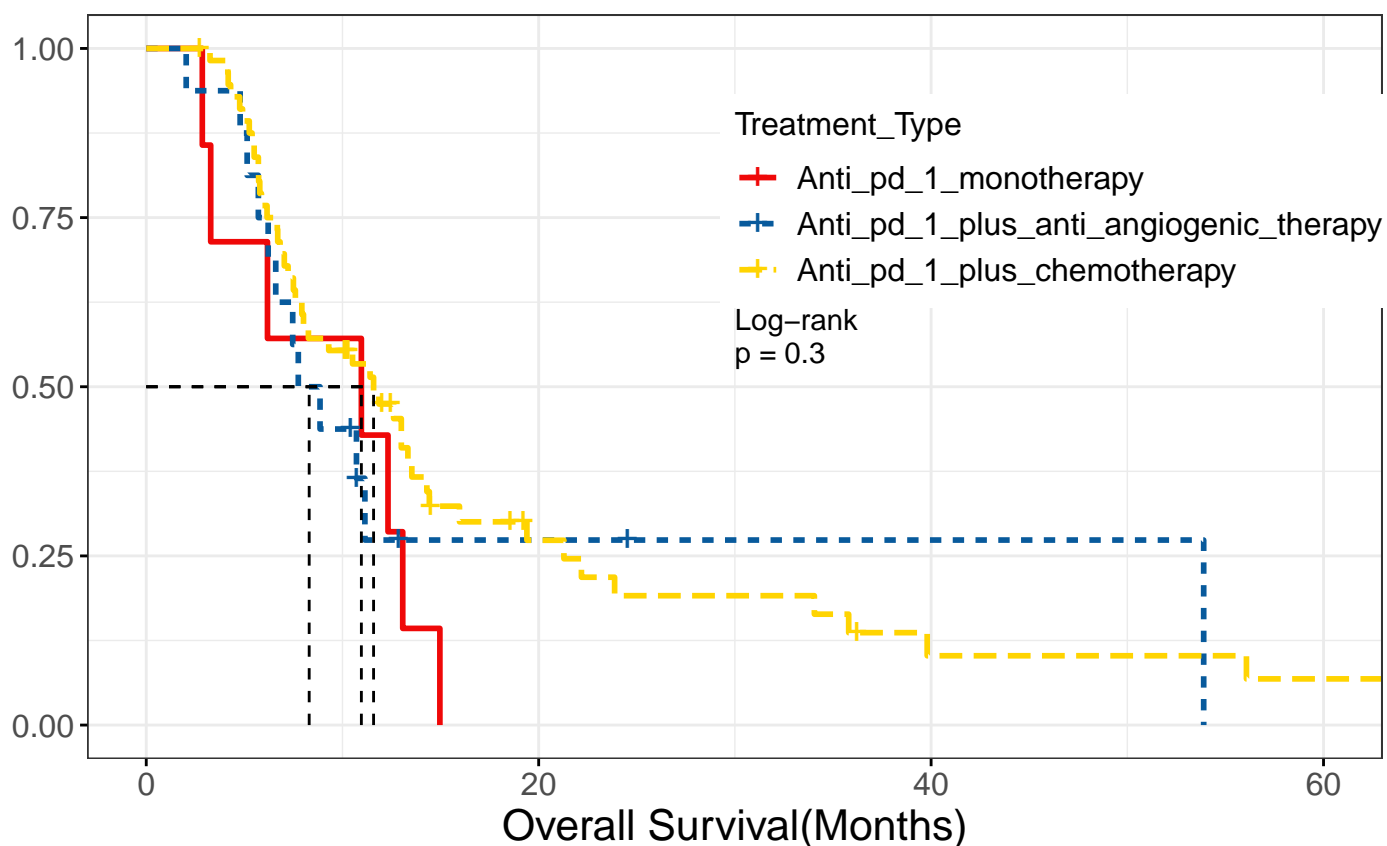

Number at risk

| Treatment_Type                         | 0  | 20 | 40 | 60 |
|----------------------------------------|----|----|----|----|
| Anti_pd_1_monotherapy                  | 7  | 0  | 0  | 0  |
| Anti_pd_1_plus_anti_angiogenic_therapy | 16 | 2  | 1  | 0  |
| Anti_pd_1_plus_chemotherapy            | 57 | 10 | 3  | 2  |

Overall Survival(Months)
